# Supplementary material
Source: Springer Nature journal article supplement (https://www.springermedizin.de/resource/supplementary/12937_2011_417_MOESM1_ESM.pdf/25653336)

**A**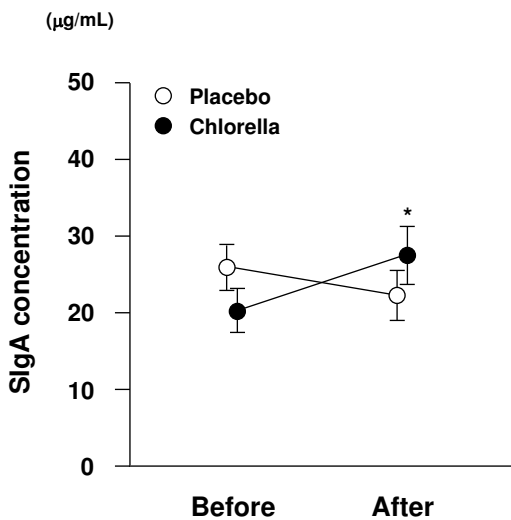**B**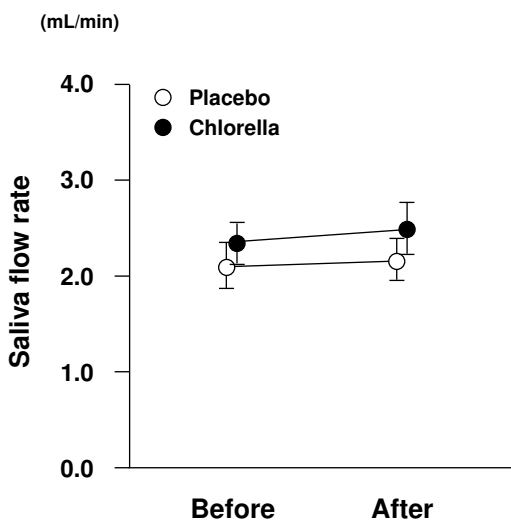**C**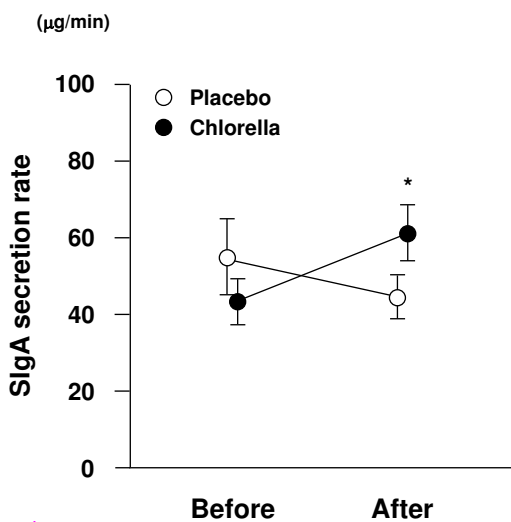

Supplement: MOESM1 [file 25653336]
